# Supplementary material for: In silico-driven multicomponent synthesis of 4,5- and 1,5-disubstituted imidazoles as indoleamine 2,3-dioxygenase inhibitors
Source: Royal Society of Chemistry journal article supplement (doi:10.1039/c5md00317b), 2015-10-08
Supplement: c5md00317b1.pdf [file c5md00317b1.pdf]

## ***In silico*-driven multicomponent synthesis of 4,5- and 1,5-disubstituted imidazoles as indoleamine 2,3-dioxygenase inhibitors**

Silvia Fallarini,<sup>§</sup> Alberto Massarotti,<sup>§</sup> Alessandro Gesù, Sara Giovarruscio, Giulia Coda Zabetta, Roberta Bergo, Barbara Giannelli, Angelo Brunco, Grazia Lombardi, Giovanni Sorba and Tracey Pirali\*

Dipartimento di Scienze del Farmaco, Università degli Studi del Piemonte Orientale "A. Avogadro", Largo Donegani 2  
28100 Novara, Italy

<sup>§</sup> These Authors contributed equally to this manuscript.

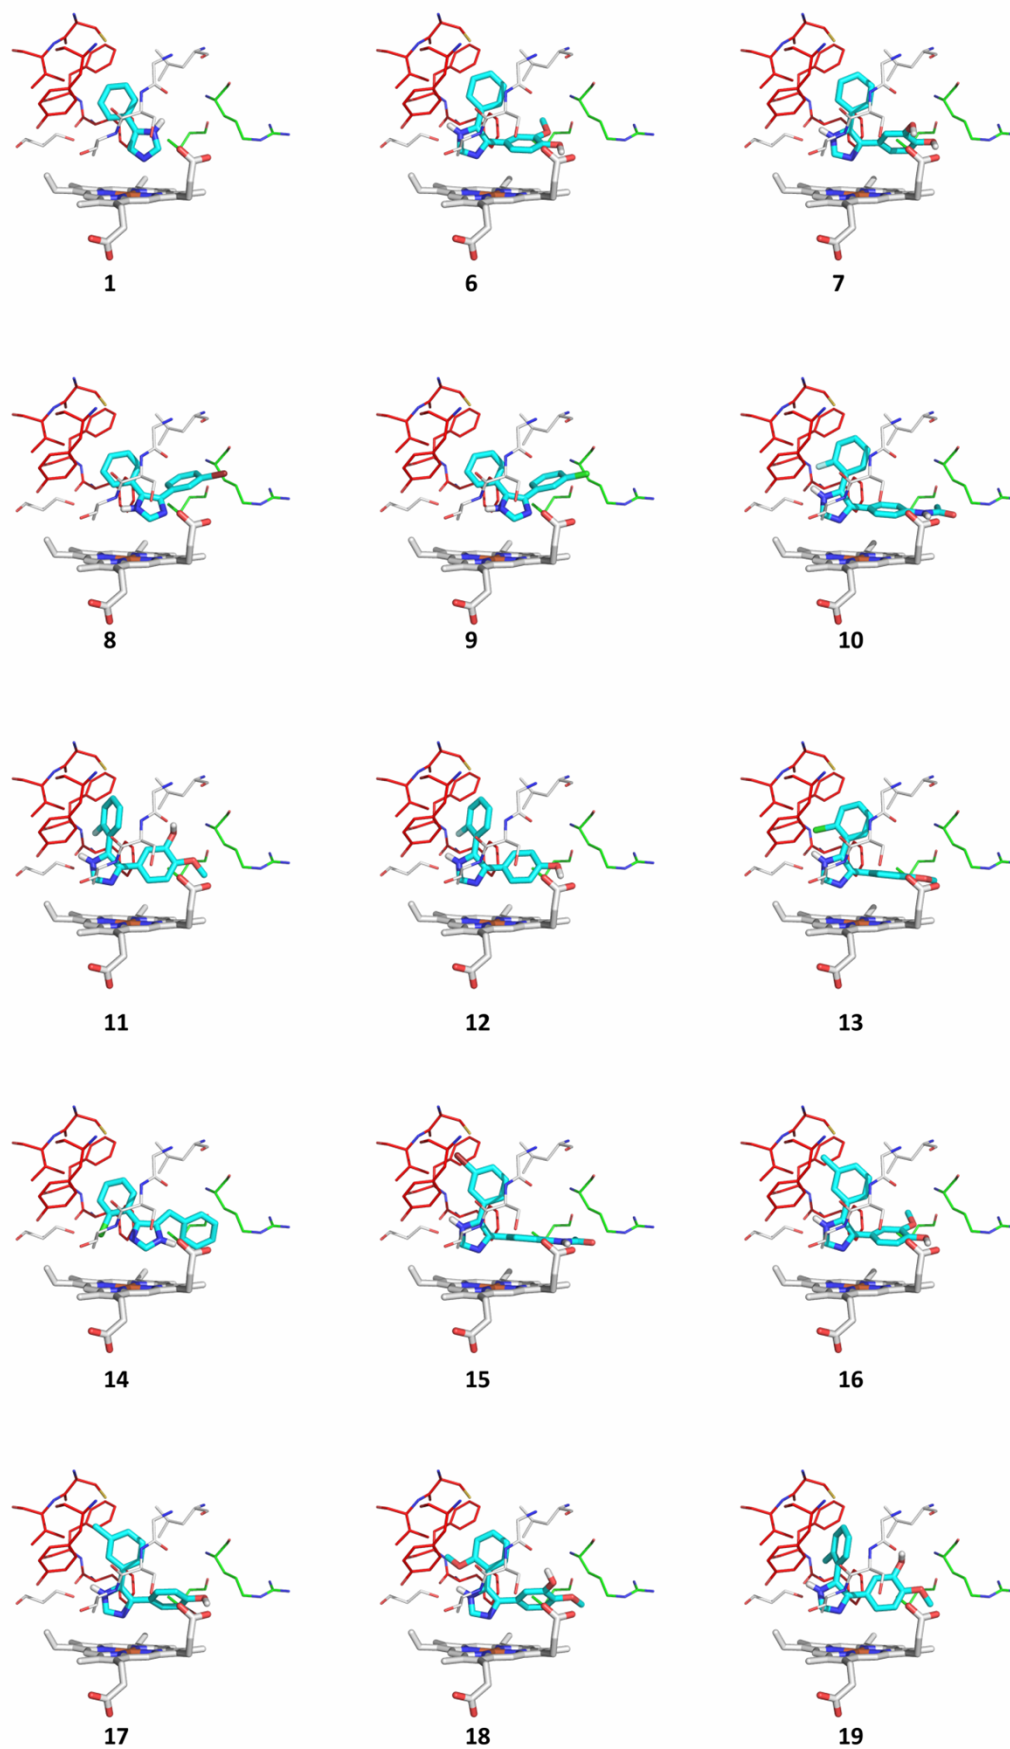

**Fig. 15.** Docked pose of the synthesized compounds (**1, 6-30**). Docked compounds are depicted as cyan sticks, pocket A as red lines and pocket B as green lines.

**Fig. 15.** Docked pose of the synthesized compounds (continue).

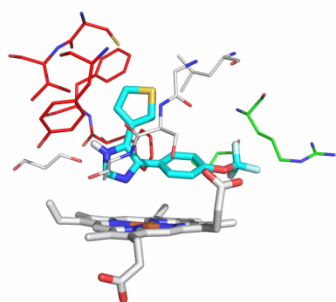

**20**

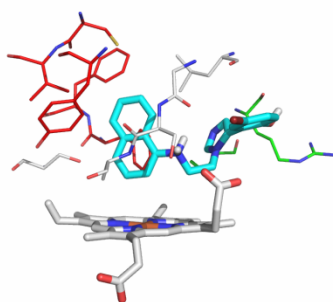

**21**

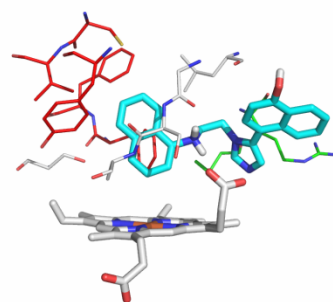

**22**

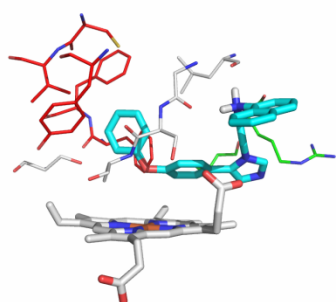

**23**

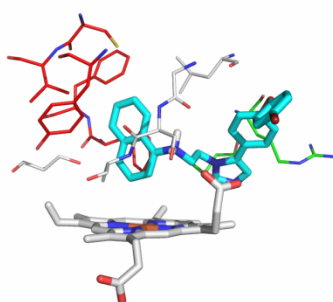

**24**

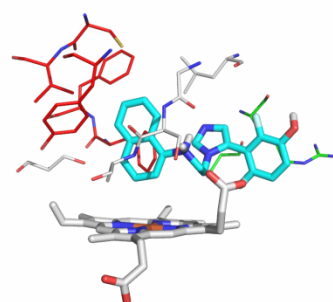

**25**

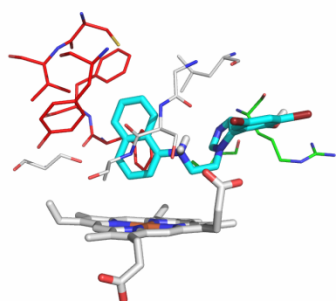

**26**

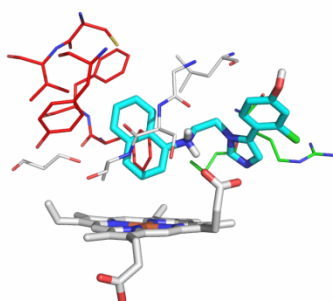

**27**

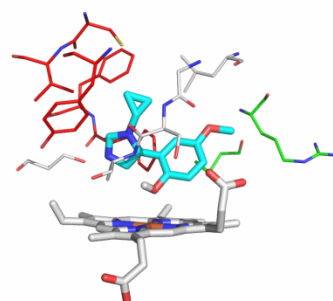

**28**

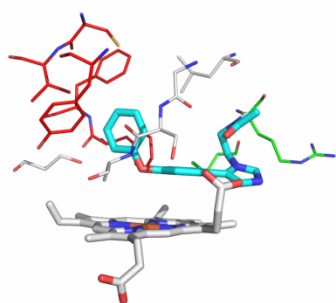

**29**

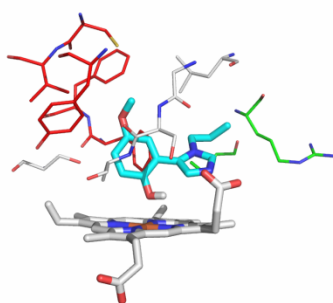

**30**

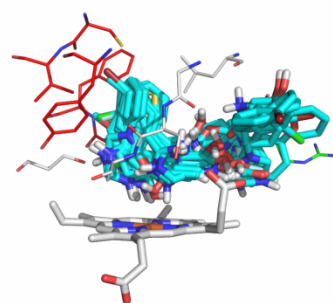

**all**

### General procedure for the synthesis of formamides a-g.

To a solution of aldehyde (1 equiv) in acetonitrile and toluene, formamide (2.5 equiv) and TMSiCl (1.1 equiv) are added. After stirring at 50 °C for four hours under a nitrogen atmosphere, *p*-toluensulphonic acid (1.5 equiv) is added. The reaction mixture is stirred at 50 °C for 24 hours. The reaction is cooled to room temperature, diluted with Et<sub>2</sub>O and washed with water (1x). The organic phase is dried over sodium sulphate and evaporated to give a solid. TBME is added and the suspension is cooled to 0 °C in order to promote the precipitation. The precipitated white solid is collected by filtration using a Buchner funnel and rinsed with TBME (x 3). The obtained material is used in the next step without further purification.

***N*-(Phenyl(tosyl)methyl)formamide (a).** White solid. Yield 60%. mp 156-157 °C.  $\nu_{\max}/\text{cm}^{-1}$  3337, 2977, 1593, 1514, 1454, 1319, 1148, 816, 696. <sup>1</sup>H NMR  $\delta_{\text{H}}$  (300 MHz; DMSO-*d*<sub>6</sub>) 7.97 (s, 1 H), 7.71 (d, *J* = 7.9 Hz, 2 H), 7.56-7.53 (m, 2 H), 7.46-7.38 (m, 5 H), 6.39 (d, *J* = 10.7 Hz, 1 H), 2.40 (s, 3H). <sup>13</sup>C NMR  $\delta_{\text{C}}$  (75 MHz; DMSO-*d*<sub>6</sub>) 160.8, 145.4, 133.9, 130.8, 130.2, 130.0, 129.7, 128.8, 128.7, 70.7, 21.7.

***N*-((2-Fluorophenyl)(tosyl)methyl)formamide (b).** White solid. Yield 70%. mp 149-150 °C.  $\nu_{\max}/\text{cm}^{-1}$  3359, 3274, 2961, 2880, 1591, 1513, 1318, 1147, 817, 764. <sup>1</sup>H NMR  $\delta_{\text{H}}$  (300 MHz; CDCl<sub>3</sub>) 8.63 (d, *J* = 10.4 Hz, 1 H), 8.07 (s, 1 H), 7.65 (d, *J* = 8.2 Hz, 2 H), 7.53 (m, 1 H), 7.35 (m, 1 H), 7.25 (d, *J* = 8.2 Hz, 2 H), 7.15 (t, *J* = 7.8 Hz, 1 H), 6.99 (t, *J* = 7.8 Hz, 1 H), 6.60 (d, *J* = 10.4 Hz, 1 H), 2.37 (s, 3 H). <sup>13</sup>C NMR  $\delta_{\text{C}}$  (75 MHz; CDCl<sub>3</sub>) 160.9 (d, *J* = 248.5 Hz), 160.4, 145.6, 133.2, 131.7 (d, *J* = 8.5 Hz), 130.2, 129.8, 129.4, 124.5 (d, *J* = 3.4 Hz), 118.0 (d, *J* = 13.1 Hz), 115.7 (d, *J* = 21.7 Hz), 65.2, 21.8.

***N*-((2-Chlorophenyl)(tosyl)methyl)formamide (c).** White solid. Yield 61%. mp 128-129 °C.  $\nu_{\max}/\text{cm}^{-1}$  3367, 2968, 2919, 1595, 1506, 1480, 1306, 1143, 1085, 814. <sup>1</sup>H NMR  $\delta_{\text{H}}$  (300 MHz; CDCl<sub>3</sub>) 8.10 (s, 1 H), 7.71-7.57 (m, 3 H), 7.31-7.25 (m, 5 H), 6.98 (d, *J* = 9.9 Hz, 1 H), 2.38 (s, 3 H). <sup>13</sup>C NMR  $\delta_{\text{C}}$  (75 MHz; CDCl<sub>3</sub>) 160.6, 145.9, 135.4, 133.2, 131.1, 130.0, 129.9, 129.6, 129.4, 128.7, 127.5, 67.0, 21.8.

***N*-((3-Bromophenyl)(tosyl)methyl)formamide (d).** White solid. Yield 31%. mp 138-145 °C.  $\nu_{\max}/\text{cm}^{-1}$  3331, 2970, 2412, 1928, 1666, 1511, 1318, 1147, 580. <sup>1</sup>H NMR  $\delta_{\text{H}}$  (300 MHz; CD<sub>3</sub>OD) 8.08 (s, 1 H), 7.71 (d, *J* = 7.5 Hz, 2 H), 7.65 (s, 1 H), 7.59 (d, *J* = 7.2 Hz, 1 H), 7.46 (d, *J* = 7.2 Hz, 2 H), 7.32 (t, *J* = 7.2 Hz, 1 H), 6.33 (s, 1 H), 2.44 (s, 3 H). <sup>13</sup>C NMR  $\delta_{\text{C}}$  (75 MHz; DMSO-*d*<sub>6</sub>) 160.8, 145.6, 133.7, 133.5, 132.9, 132.6, 130.9, 130.2, 129.2, 129.0, 122.1, 70.0, 21.7.

***N*-(*m*-Tolyl(tosyl)methyl)formamide (e).** Yellow solid. Yield 42%. mp 88-89 °C.  $\nu_{\max}/\text{cm}^{-1}$  3530, 2868, 1685, 1318, 1145, 815, 580  $\text{cm}^{-1}$ . <sup>1</sup>H NMR  $\delta_{\text{H}}$  (300 MHz; DMSO-*d*<sub>6</sub>) 9.73 (d, *J* = 10.5 Hz, 1 H), 7.94 (s, 1 H), 7.71 (d, *J* = 7.8 Hz, 2 H), 7.42 (d, *J* = 7.8 Hz, 2 H), 7.35-7.26 (m, 5 H), 6.31 (d, *J* = 10.5, 1 H), 2.41 (s, 3 H), 2.31 (s, 3 H). <sup>13</sup>C NMR  $\delta_{\text{C}}$  (75 MHz; CDCl<sub>3</sub>) 160.8, 145.6, 144.4, 138.6, 133.1, 130.7, 129.9, 129.8, 129.6, 128.7, 126.1, 71.1, 21.6, 21.3.

***N*-((2-Methoxyphenyl)(tosyl)methyl)formamide (f).** White solid. Yield 78%. mp 155-156 °C.  $\nu_{\max}/\text{cm}^{-1}$  3316, 2981, 2842, 1595, 1495, 1468, 1316, 1258, 1235, 1143, 815, 759. <sup>1</sup>H NMR  $\delta_{\text{H}}$  (300 MHz; CDCl<sub>3</sub>) 8.17 (s, 1 H), 7.99 (d, *J* = 6.8 Hz, 1 H), 7.72-7.59 (m, 2 H), 7.40-7.30 (m, 2 H), 7.22-7.20 (m, 2 H), 6.95 (m, 1 H), 6.79-6.70 (m, 2 H), 3.59 (s, 3 H), 2.37 (s, 3 H). <sup>13</sup>C NMR  $\delta_{\text{C}}$  (75 MHz; CDCl<sub>3</sub>) 160.5, 157.8, 145.1, 133.9, 131.3, 130.3, 129.5, 129.4, 121.0, 118.4, 111.3, 67.7, 55.7, 21.7.

***N*-(*o*-Tolyl(tosyl)methyl)formamide (g).** White solid. Yield 63%. mp 134-135 °C.  $\nu_{\max}/\text{cm}^{-1}$  3343, 2967, 2877, 1595, 1511, 1490, 1301, 1142, 811, 756. <sup>1</sup>H NMR  $\delta_{\text{H}}$  (300 MHz; CDCl<sub>3</sub>) 8.05 (s, 1 H), 7.71 (d, *J* = 8.2 Hz, 2 H), 7.55 (d, *J* = 7.1 Hz, 1 H), 7.31-7.21 (m, 4 H), 7.17 (d, *J* = 7.1 Hz, 1 H), 6.64 (d, *J* = 10.4 Hz, 1 H), 2.40 (s, 3 H), 2.33 (s, 3 H). <sup>13</sup>C NMR  $\delta_{\text{C}}$  (75 MHz; CDCl<sub>3</sub>) 160.2, 145.6, 138.3, 133.5, 130.9, 129.9, 129.3, 129.0, 127.8, 127.3, 126.6, 66.6, 21.8, 19.7.

### General procedure for the synthesis of substituted TosMIC derivatives h-n.

To a solution of formamide **a-g** (1 equiv) in THF, POCl<sub>3</sub> (2 equiv) is added under a nitrogen atmosphere at room temperature. The reaction is cooled to -10 °C and TEA (6 equiv) is added dropwise. The reaction is stirred at -10 °C for one hour and then quenched with NaHCO<sub>3</sub> at 0 °C. After reaching room temperature, the reaction is diluted with EtOAc, washed with a saturated solution of NaHCO<sub>3</sub>, dried over Na<sub>2</sub>SO<sub>4</sub> and evaporated. The crude material is purified by gravimetric column.

**1-((Isocyano(phenyl)methyl)sulfonyl)-4-methylbenzene (h).** Yellow solid. Yield 65%. mp 128-129 °C.  $\nu_{\max}/\text{cm}^{-1}$  2951, 2130, 1592, 1489, 1454, 1331, 1151, 816, 722, 698. <sup>1</sup>H NMR  $\delta_{\text{H}}$  (300 MHz; CDCl<sub>3</sub>) 7.59 (d, *J* = 8.2 Hz, 2H), 7.48-7.29 (m, 7H), 5.62 (s, 1H), 2.45 (s, 3H). <sup>13</sup>C NMR  $\delta_{\text{C}}$  (75 MHz; CDCl<sub>3</sub>) 166.2, 146.7, 130.8, 130.6, 130.1, 129.8, 128.8, 128.5, 126.7, 76.5, 21.9.

**1-Fluoro-2-(isocyano(tosyl)methyl)benzene (i).** Yellow solid. mp 216-217 °C. Yield 49%.  $\nu_{\max}/\text{cm}^{-1}$  3064, 2939, 2140, 1594, 1492, 1340, 1159, 817, 709. <sup>1</sup>H NMR  $\delta_{\text{H}}$  (300 MHz; CDCl<sub>3</sub>) 7.73 (d, *J* = 8.5 Hz, 2H), 7.50-7.41 (m, 2H), 7.37 (d, *J* = 8.5 Hz, 2H), 7.21 (t, *J* = 7.7 Hz, 1H), 7.12 (t, *J* = 9.6 Hz, 1H), 5.97 (s, 1H), 2.48 (s, 3H). <sup>13</sup>C NMR  $\delta_{\text{C}}$  (75 MHz; CDCl<sub>3</sub>) 164.1 (d, *J* =

291.4 Hz), 158.7, 146.9, 132.9 (d,  $J = 8.9$  Hz), 130.6, 130.5, 130.1, 129.4, 124.9 (d,  $J = 4.0$  Hz), 116.1 (d,  $J = 20.6$  Hz), 115.1 (d,  $J = 126$  Hz), 69.7, 21.9.

**1-Chloro-2-(isocyano(tosyl)methyl)benzene (j).** Yellow solid. Yield 69%. mp 103-104 °C.  $\nu_{\max}/\text{cm}^{-1}$  2955, 2923, 2143, 1595, 1441, 1340, 1153, 1085, 813, 715 7.74 (d,  $J = 7.9$  Hz, 2H).  $^1\text{H NMR } \delta_{\text{H}}$  (300 MHz;  $\text{CDCl}_3$ ) 7.52 (d,  $J = 7.1$  Hz, 1H), 7.43-7.32 (m, 5H), 6.23 (s, 1H), 2.47 (s, 3H).  $^{13}\text{C NMR } \delta_{\text{C}}$  (75 MHz;  $\text{CDCl}_3$ ) 165.8, 147.0, 135.0, 132.2, 131.1, 130.4, 130.2, 130.0, 129.9, 127.6, 125.3, 72.2, 21.9.

**1-Bromo-3-(isocyano(tosyl)methyl)benzene (k).** Yellow solid. Yield 10%. mp 80-83 °C.  $\nu_{\max}/\text{cm}^{-1}$  2956, 2135, 1592, 1333, 1149, 580.  $^1\text{H NMR } \delta_{\text{H}}$  (300 MHz;  $\text{CDCl}_3$ ) 7.61 (d,  $J = 6.9$  Hz, 2H), 7.60 (s, 1H), 7.40 (s, 1H), 7.35 (d,  $J = 6.9$  Hz, 2H), 7.29 (s, 1H), 7.26 (s, 1H), 5.55 (s, 1H), 2.47 (s, 3H).  $^{13}\text{C NMR } \delta_{\text{C}}$  (75 MHz;  $\text{DMSO-d}_6$ ) 160.9, 147.4, 145.7, 134.1, 132.5, 130.8, 130.3, 130.2, 129.7, 128.0, 122.2, 69.9, 21.9.

**2-(*m*-Tolyl)-2-tosylacetonitrile (l).** Yellow solid. Yield 65%. mp 126-127 °C.  $\nu_{\max}/\text{cm}^{-1}$  2961, 2136, 1592, 1328, 1151, 580).  $^1\text{H NMR } \delta_{\text{H}}$  (300 MHz;  $\text{CDCl}_3$ ) 7.59 (d,  $J = 7.5$  Hz, 2H), 7.28 (d,  $J = 7.5$ , 2H), 7.22-7.11 (m, 4H), 5.62 (s, 1H), 2.41 (s, 3H), 2.29 (s, 3H).  $^{13}\text{C NMR } \delta_{\text{C}}$  (75 MHz;  $\text{CDCl}_3$ ) 165.9, 164.7, 138.8, 131.6, 130.6, 130.4, 129.9, 129.2, 128.7, 126.6, 125.8, 76.5, 21.9, 21.3.

**1-(Isocyano(tosyl)methyl)-2-methoxybenzene (m).** Yellow solid. Yield 46%. mp 118-119 °C.  $\nu_{\max}/\text{cm}^{-1}$  2962, 2841, 2143, 1598, 1494, 1463, 1322, 1256, 1159, 818, 751.  $^1\text{H NMR } \delta_{\text{H}}$  (300 MHz;  $\text{CDCl}_3$ ) 7.66 (d,  $J = 7.9$  Hz, 2H), 7.40 (t,  $J = 7.3$  Hz, 1H), 7.34-7.29 (m, 3H), 6.99 (t,  $J = 7.3$  Hz, 1H), 6.86 (d,  $J = 7.3$  Hz, 1H), 6.25 (s, 1H), 3.73 (s, 3H), 2.45 (s, 3H).  $^{13}\text{C NMR } \delta_{\text{C}}$  (75 MHz;  $\text{CDCl}_3$ ) 164.6, 157.2, 146.3, 132.3, 131.3, 130.5, 129.7, 129.0, 121.0, 115.9, 111.0, 69.9, 55.9, 21.8.

**1-(Isocyano(tosyl)methyl)-2-methylbenzene (n).** Yellow solid. Yield 82%. mp 118-119 °C.  $\nu_{\max}/\text{cm}^{-1}$  2977, 2137, 1594, 1492, 1463, 1335, 1149, 817, 733.  $^1\text{H NMR } \delta_{\text{H}}$  (300 MHz;  $\text{CDCl}_3$ ) 7.68 (d,  $J = 8.9$  Hz, 2H), 7.37-7.34 (m, 3H), 7.25-7.19 (m, 3H), 5.89 (s, 1H), 2.47 (s, 3H), 2.43 (s, 3H).  $^{13}\text{C NMR } \delta_{\text{C}}$  (75 MHz;  $\text{CDCl}_3$ ) 165.2, 146.8, 138.0, 131.4, 131.0, 130.7, 130.1, 128.6, 128.0, 126.8, 125.5, 74.9, 22.0, 19.7.

Cellular and enzymatic concentration-response curves.

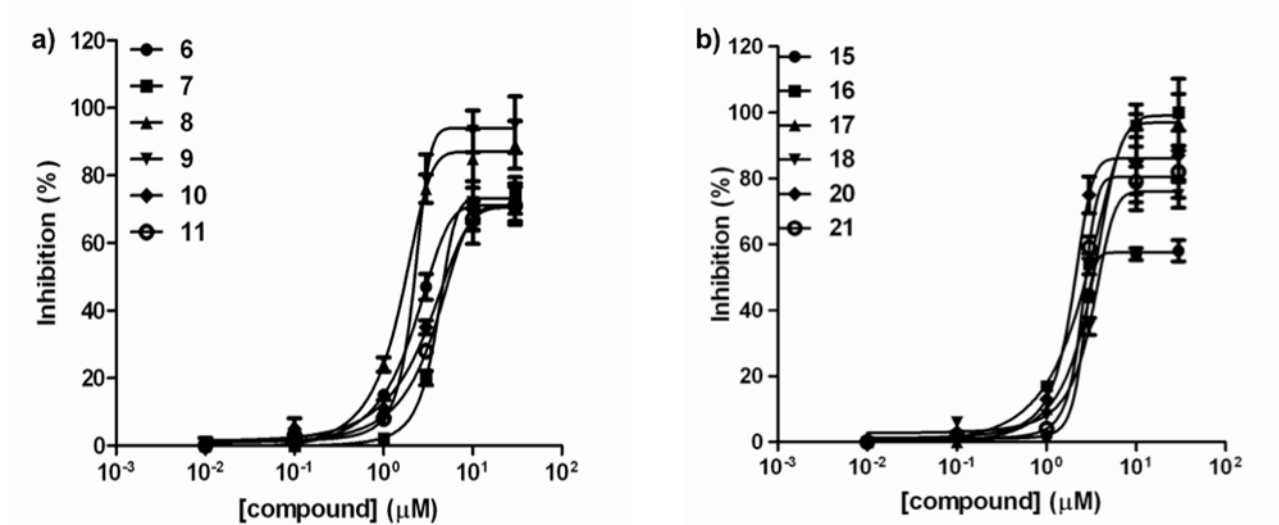

**Fig. 2S.** Concentration-response curves for tested compounds (a, 6-11; b, 15-21) in IDO1 inhibition cell-based assay. A375 cells were treated (48h) with IFN- $\gamma$  (500 U/mL) and increasing concentrations (0.01-30  $\mu$ M) of each compound. The L-KYN levels in cell culture supernatants were measured by HPLC method. The data represent mean  $\pm$  SEM of at least three independent assays run in triplicate. Percent inhibition against inhibitor concentration was plotted and IC<sub>50</sub> value was determined. The data were evaluated by GraphPad 5.0.

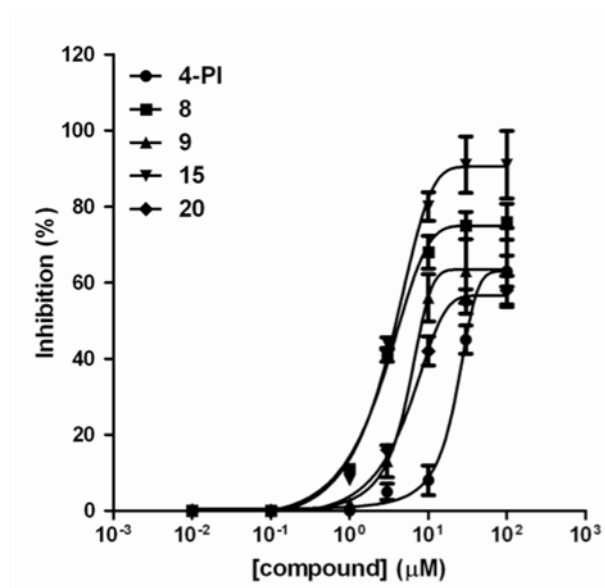

**Fig. 3S.** Concentration-response curves for 4-PI and compounds 8, 9, 15 and 20 in IDO1 inhibition enzymatic assay. Increasing concentrations (0.01-100  $\mu$ M) of each inhibitor was added to a standard reaction mixture (see Experimental section) in presence of 50 nM of human recombinant IDO. The reaction was carried out at 37  $^{\circ}$ C for 60 min. The L-KYN levels were revealed by Ehrlich's reagent and evaluated by a microplate reader. The data represent mean  $\pm$  SEM of at least three independent assays run in triplicate. Percent inhibition against inhibitor concentration was plotted and IC<sub>50</sub> value was determined. The data were evaluated by GraphPad 5.0.

| Cpd | Hill slope value |
|-----|------------------|
| 1   | 1.1 $\pm$ 0.31   |
| 8   | 1.4 $\pm$ 0.53   |
| 9   | 1.9 $\pm$ 0.42   |
| 15  | 1.5 $\pm$ 0.23   |
| 20  | 1.8 $\pm$ 0.37   |

**Table 1S.** Hill slope values of the enzymatic curves.

3D-QSAR model generation.

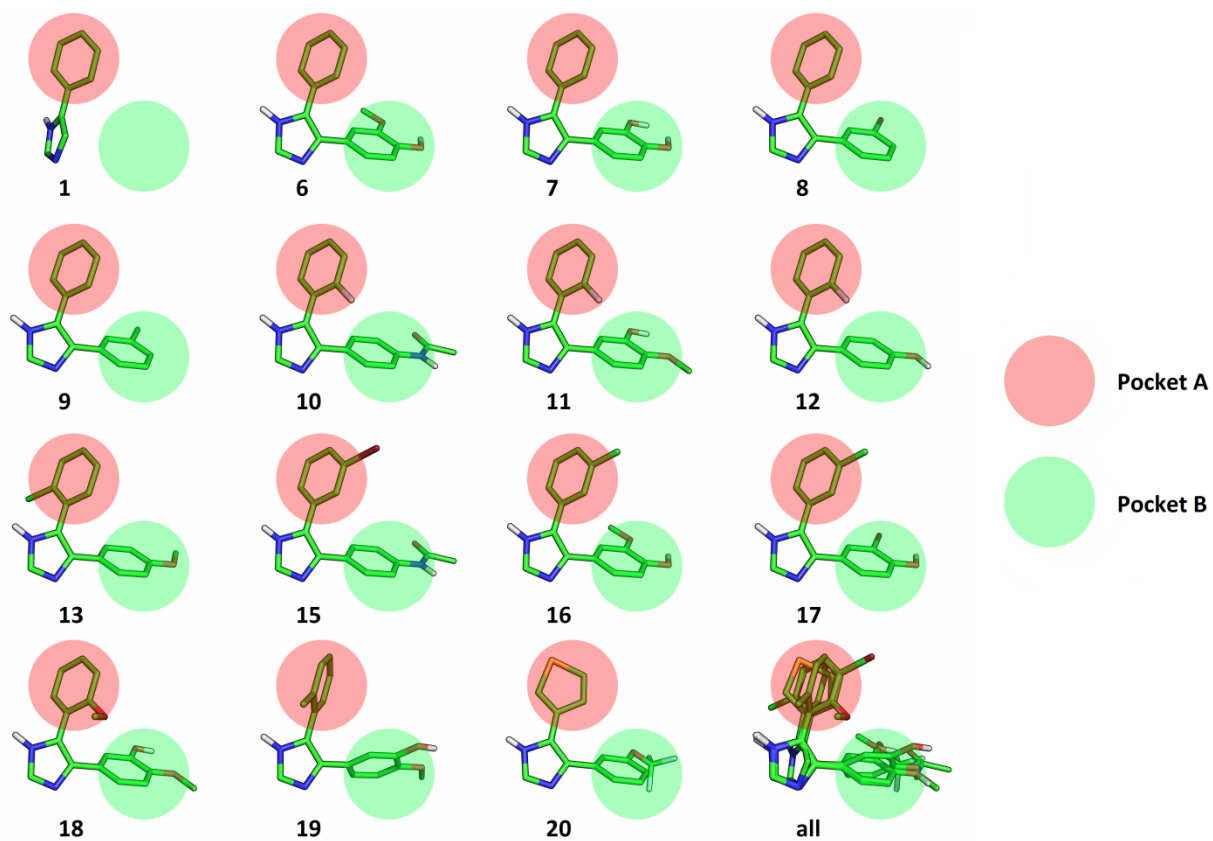

Fig. 45. Pocket-binding hypothesis of compounds 1 and 6-20 based on the 3D-QSAR alignment.

| Cpd | Set      | Exp IC <sub>50</sub> $\mu$ M | Exp pIC <sub>50</sub> | Pred pIC <sub>50</sub> |
|-----|----------|------------------------------|-----------------------|------------------------|
| 1   | Training | 150                          | 3.8                   | 3.8                    |
| 6   | Training | 3.5                          | 5.5                   | 5.5                    |
| 7   | Training | 6.3                          | 5.2                   | 5.2                    |
| 8   | Test     | 1.5                          | 5.8                   | 5.7                    |
| 9   | Training | 1.7                          | 5.8                   | 5.8                    |
| 10  | Training | 4.7                          | 5.3                   | 5.4                    |
| 11  | Training | 4.9                          | 5.3                   | 5.2                    |
| 12  | Training | 124                          | 3.9                   | 3.9                    |
| 13  | Training | 150                          | 3.8                   | 3.8                    |
| 14  | -        | -                            | -                     | -                      |
| 15  | Training | 2.9                          | 5.5                   | 5.5                    |
| 16  | Test     | 3.8                          | 5.4                   | 5.2                    |
| 17  | Training | 5.4                          | 5.3                   | 5.3                    |
| 18  | Training | 7.2                          | 5.1                   | 5.2                    |
| 19  | Test     | 56                           | 4.3                   | 4.3                    |
| 20  | Test     | 2.1                          | 5.7                   | 4.9                    |

**Table 2S.** Data set.



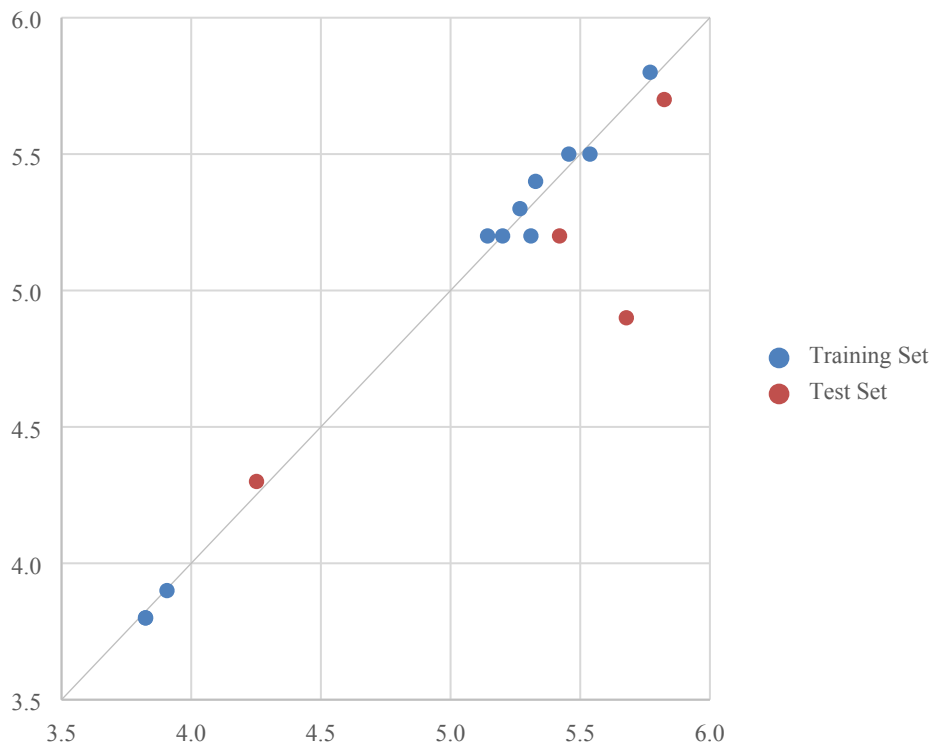

**Fig. 5S.** Predicted *versus* experimental activity as  $pIC_{50}$ .
